# Supplementary material for: Characterization and Prognosis of Biological Microenvironment in Lung Adenocarcinoma through a Disulfidptosis-Related lncRNAs Signature
Source: Hindawi journal article supplement (doi:10.1155/2023/6670514), 2023-08-04

# Figure S4

**A**

|           | pvalue | Hazard ratio       |
|-----------|--------|--------------------|
| age       | 0.224  | 1.010(0.994–1.026) |
| gender    | 0.610  | 1.082(0.799–1.466) |
| stage     | <0.001 | 1.564(1.350–1.811) |
| T         | <0.001 | 1.438(1.189–1.739) |
| N         | <0.001 | 1.604(1.345–1.914) |
| riskScore | <0.001 | 1.445(1.338–1.560) |

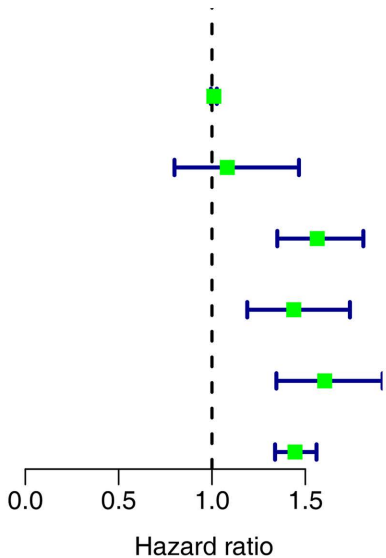**B**

|           | pvalue | Hazard ratio       |
|-----------|--------|--------------------|
| age       | 0.012  | 1.021(1.004–1.037) |
| gender    | 0.923  | 1.015(0.744–1.386) |
| stage     | 0.078  | 1.227(0.977–1.541) |
| T         | 0.365  | 1.104(0.892–1.366) |
| N         | 0.067  | 1.254(0.984–1.598) |
| riskScore | <0.001 | 1.422(1.304–1.551) |

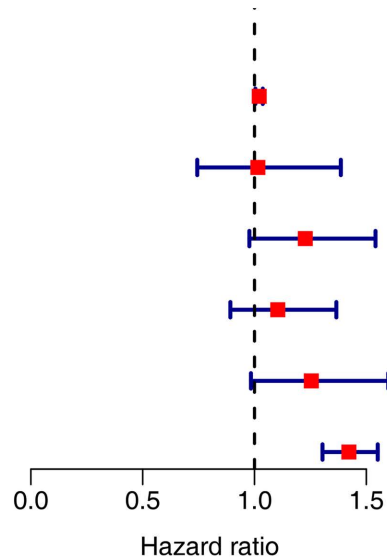

Supplement: f1 [file 6670514.f1.zip]
