# Supplementary figures and images for: Characterization and Prognosis of Biological Microenvironment in Lung Adenocarcinoma through a Disulfidptosis-Related lncRNAs Signature
Source: Hindawi journal article supplement (doi:10.1155/2023/6670514), 2023-08-04

Figure S1

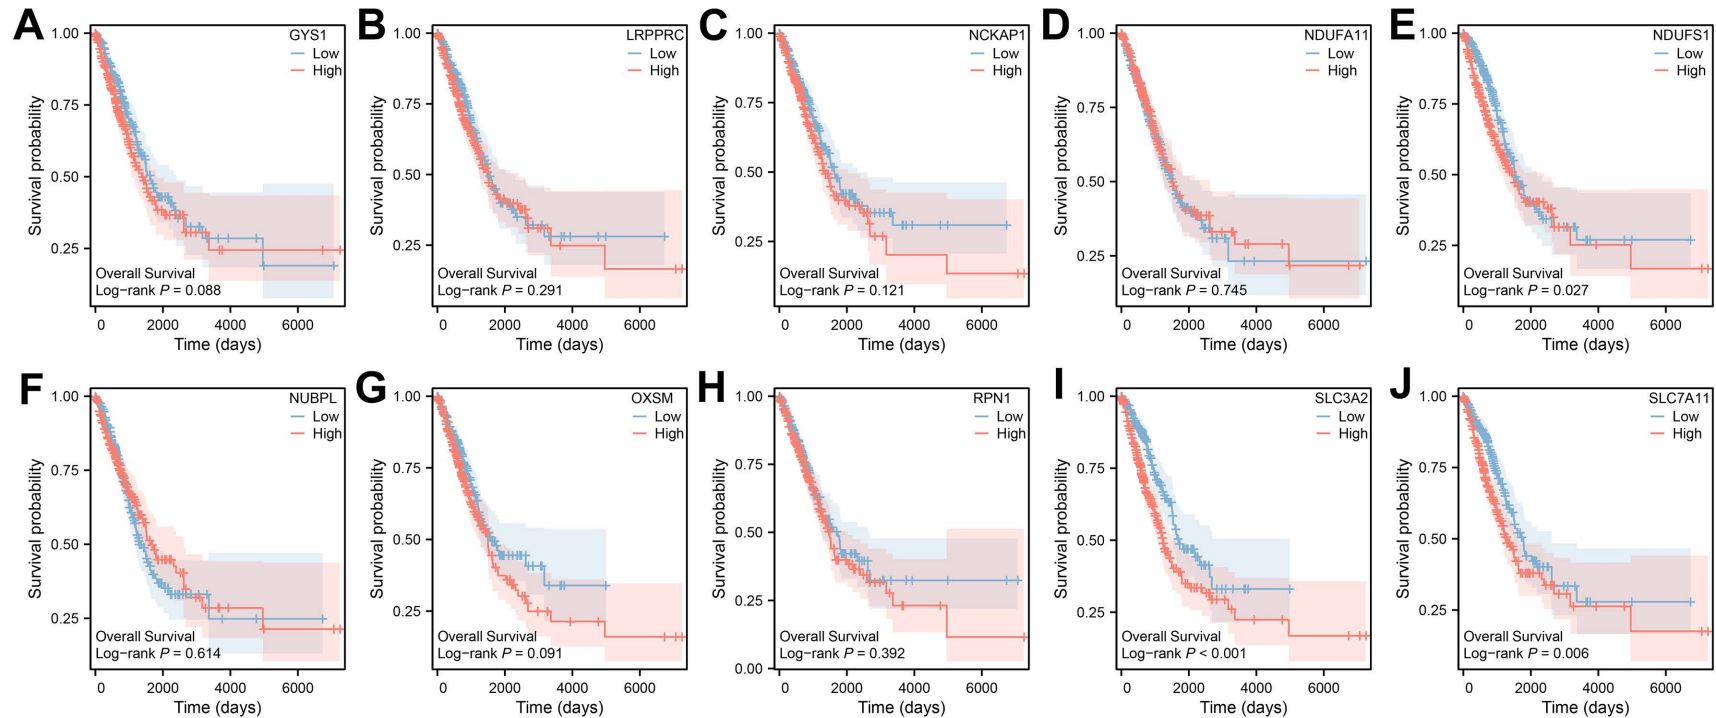

Supplement: f1 [file 6670514.f1.zip]

# Figure S5

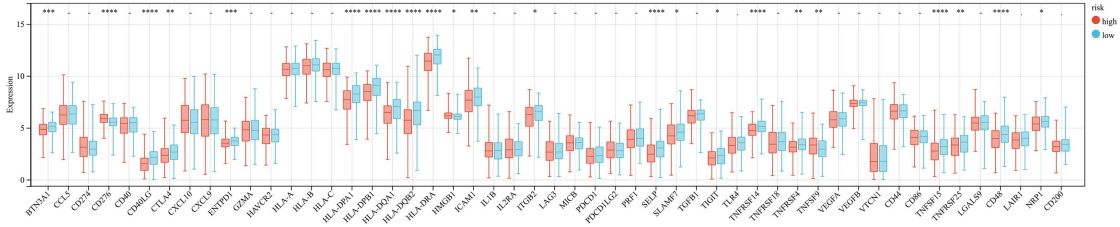

Supplement: f1 [file 6670514.f1.zip]

Figure S3

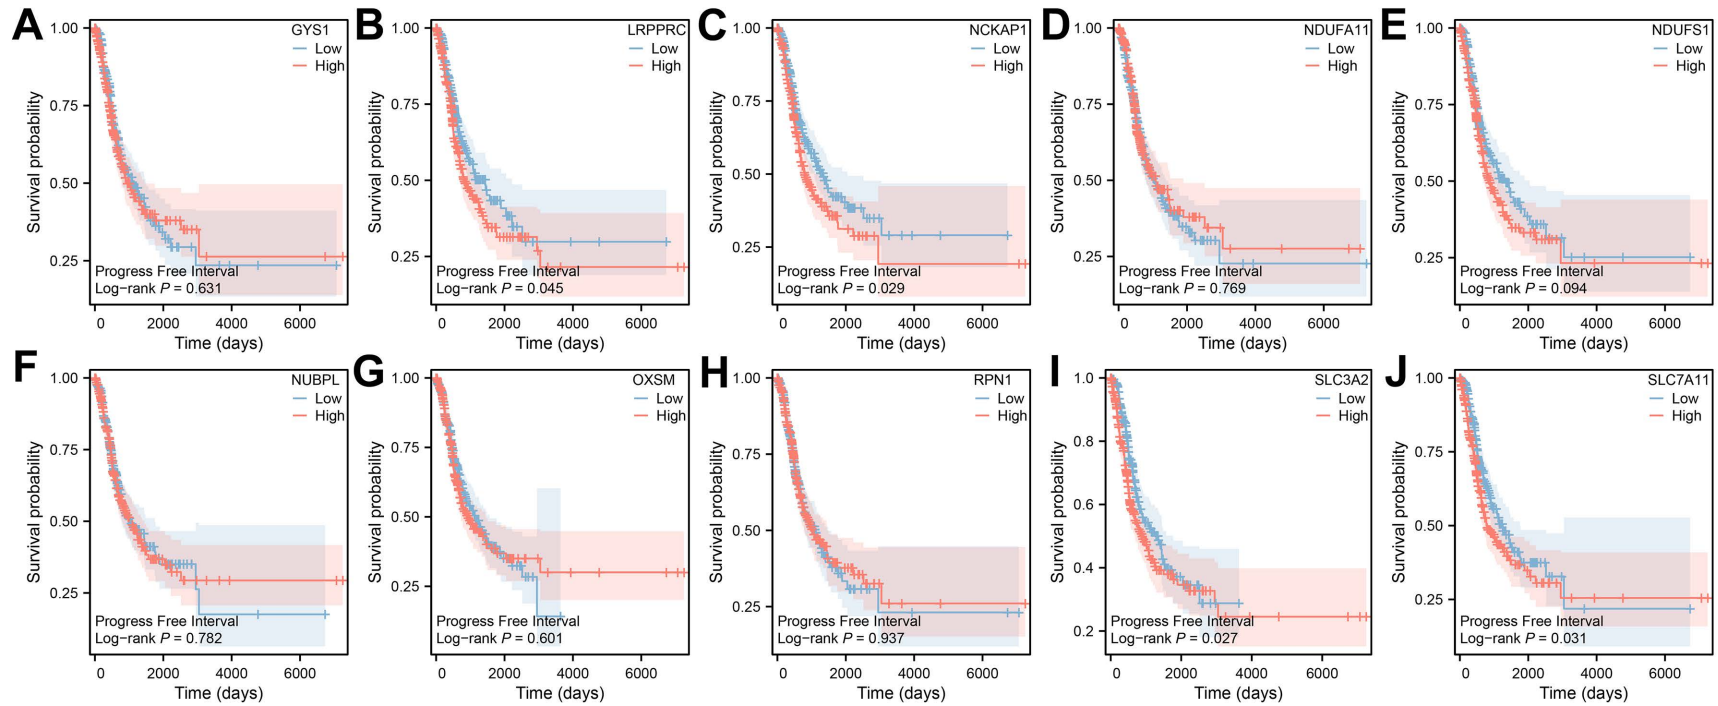

Supplement: f1 [file 6670514.f1.zip]

Figure S6

**A**

**A549**

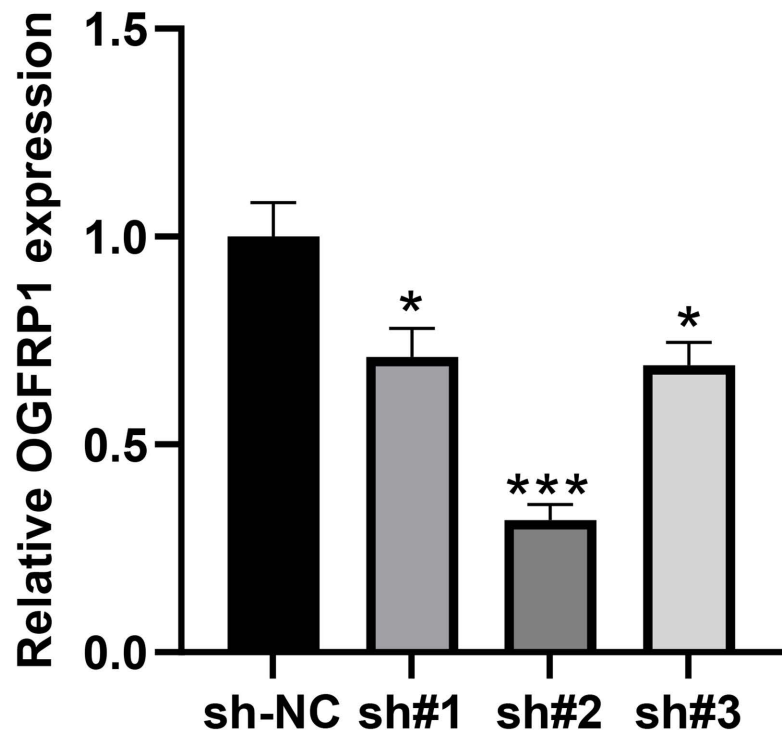

**B**

**PC-9**

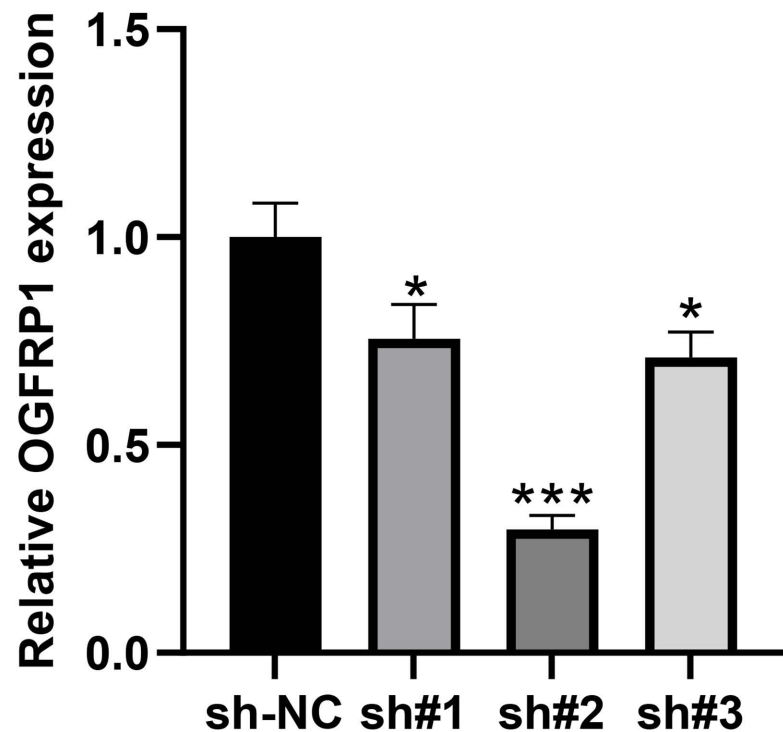

Supplement: f1 [file 6670514.f1.zip]

Figure S2

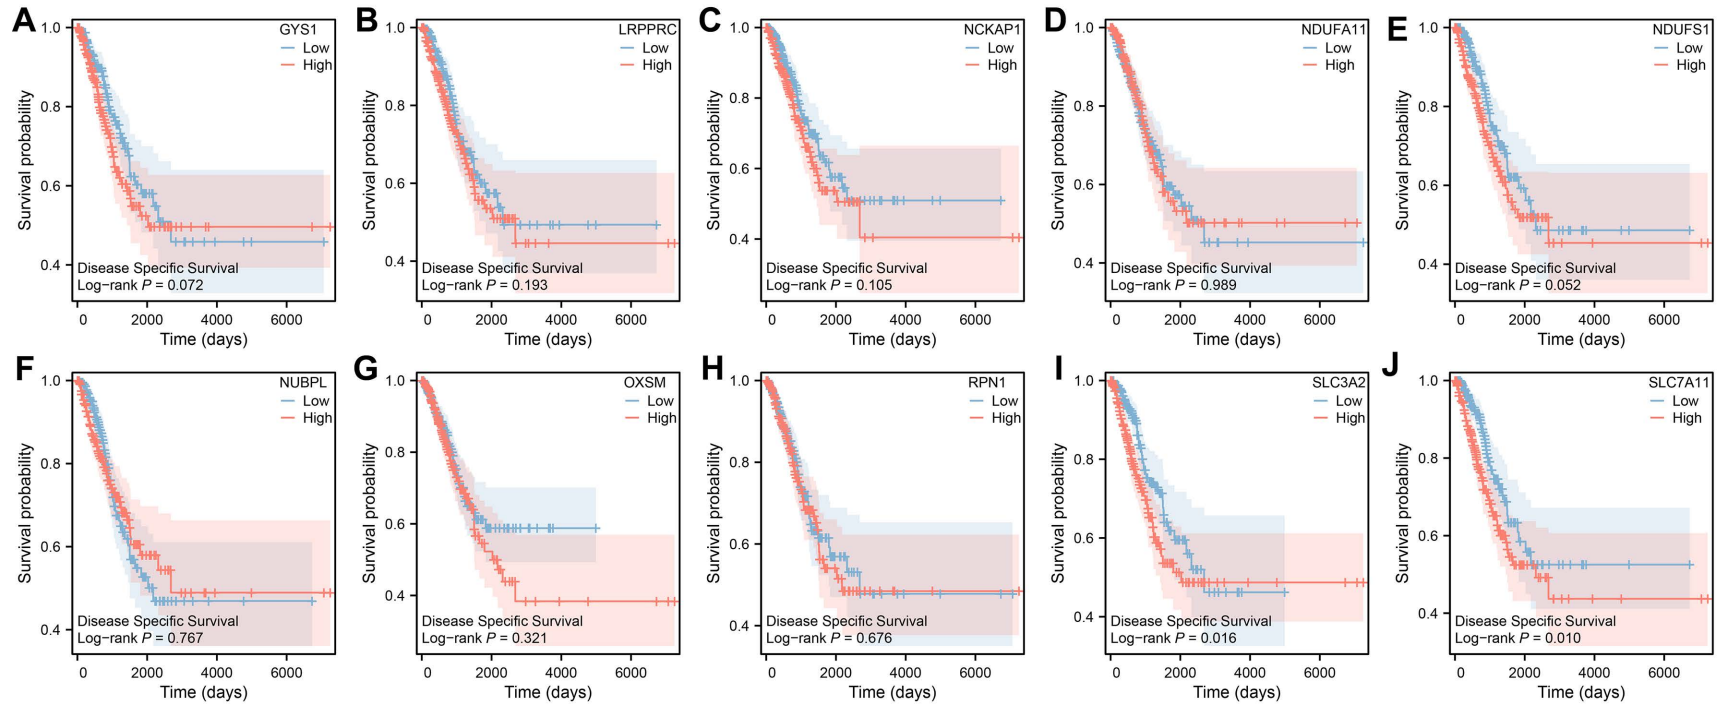

Supplement: f1 [file 6670514.f1.zip]
